# Supplementary material
Source: MDPI journal article supplement (https://www.mdpi.com/2071-1050/15/14/11057)
Supplement: s1 [file s1]

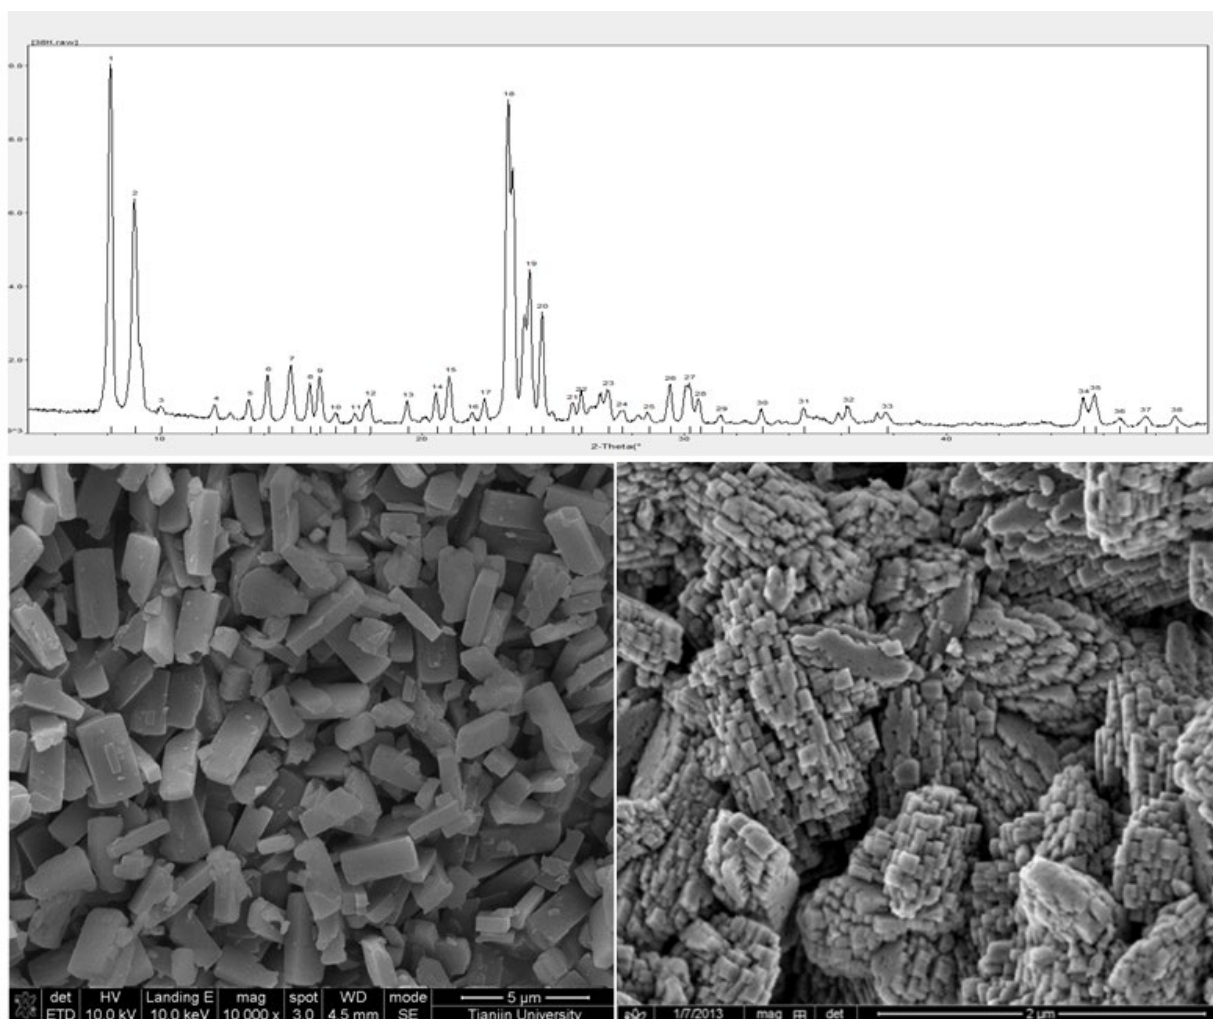

**Figure S1.** X.R.D and SEM images of "ZSM-5(50)" represents the  $\text{SiO}_2:\text{Al}_2\text{O}_3=50$ .

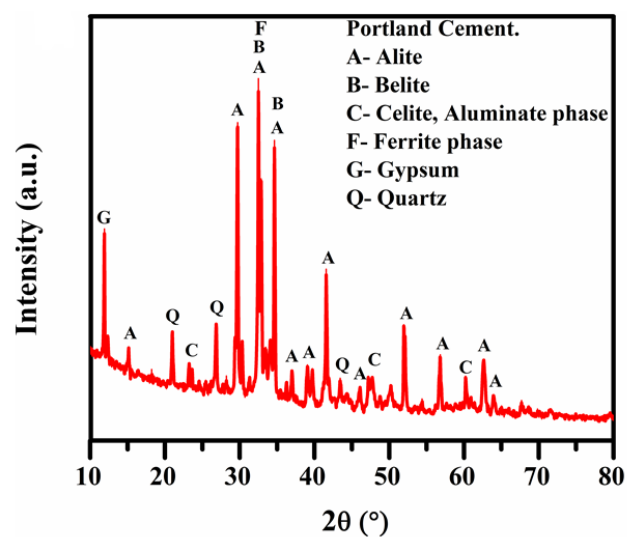

**Figure S2.** X.R.D pattern of ordinary Cement.

**Table S1.** Effect of different Catalyst on product gas yield (mL/g).

| (T/°C) 600        | H <sub>2</sub> Err | CO Err       | CH <sub>4</sub> Err | CO <sub>2</sub> Err | C <sub>2</sub> H <sub>4</sub> Err | C <sub>2</sub> H <sub>6</sub> Err |
|-------------------|--------------------|--------------|---------------------|---------------------|-----------------------------------|-----------------------------------|
| CEM-ZSM-5 (bed)   | 45.68 ± 3.15       | 50.79 ± 3.00 | 27.44 ± 3.15        | 105.62 ± 6.00       | 1.71 ± 0.05                       | 4.38 ± 0.50                       |
| Cement (10 wt. %) | 40.43 ± 3.00       | 62.52 ± 4.55 | 26.37 ± 3.00        | 99.97 ± 5.65        | 2.06 ± 0.09                       | 5.28 ± 0.75                       |
| ZSM-5 (10 wt. %)  | 37.95 ± 2.65       | 55.93 ± 3.75 | 21.94 ± 2.80        | 91.47 ± 5.15        | 2.93 ± 0.15                       | 3.50 ± 0.15                       |
| Without catalyst  | 35.86 ± 2.55       | 45.90 ± 3.55 | 21.07 ± 2.75        | 88.90 ± 5.00        | 1.34 ± 0.05                       | 3.56 ± 0.15                       |

**Table S2.** Constituents of biofuel derived from pyrolysis using cement catalyst.

| Rice straw Non catalytic pyrolysis    |                  | Cement catalytic pyrolysis of rice straw |                  |
|---------------------------------------|------------------|------------------------------------------|------------------|
| Name of Compounds                     | Relative area, % | Name of Compounds                        | Relative area, % |
| Phenol                                | 12.25            | Phenol                                   | 14.12            |
| P-cresol                              | 10.88            | Toluene                                  | 13.48            |
| 3-butene-2-one-3-methyl-              | 10.00            | Phenol-3-methyl                          | 10.27            |
| Isobutane                             | 9.16             | Cyclopentanone-2-methyl                  | 8.43             |
| Naphthalene, decahydro-2, 3-dimethyl  | 5.69             | 2- propanone-1-hydroxy                   | 8.08             |
| 1, 3-cyclopentadiene, 1-methyl        | 5.58             | P-xylene                                 | 6.17             |
| Furane, 2, 3, 5-tri-methyl-           | 4.83             | Benzofuran-2, 3-dihydro                  | 6.13             |
| 2,4 –hexadienal                       | 4.04             | 4-ethyl benzoic acid                     | 4.71             |
| Benzene, 1-ethyl-4-methyl             | 3.84             | Cyclo-pentane-ethylidene                 | 4.28             |
| Benzofuran, 2, 4-dihydro              | 3.79             | 2-Naphthalenol                           | 2.93             |
| 4-pentene-2-ol                        | 3.76             | Styrene                                  | 2.77             |
| 2-Methylcyclopentene-1, 3-dion        | 3.39             | 1H-indene-3-methyl-                      | 2.69             |
| 2-pentanal-2-ethyl                    | 3.27             | Benzene 1, 3 dimethyl                    | 2.16             |
| oxalic acid allyl octyl ester         | 3.13             | Bicyclo [5, 1, 0] Octane                 | 2.15             |
| Phenol-2-methoxy                      | 2.82             | 1-Dococene                               | 2.09             |
| Phenol, 3-ethyl-5-methyl-             | 2.79             | Mesitylene                               | 2.09             |
| Styrene                               | 2.52             | 2, 3-pentane dione                       | 1.68             |
| Phenol, 2-ethyl-5-methyl-             | 2.42             | Phenol-2-methoxy<br>6-(1-propynyl)       | 1.28             |
| 1H-indene-1-one, 2, 3-dihydro         | 1.68             | 7-Heptadecene-17-chloro                  | 1.05             |
| phenol-3,5-dimethyl                   | 1.50             | 1-Nonadecene                             | 0.97             |
| Tetrahydrofuran                       | 1.08             | 1- Naphthalenol-2-methyl                 | 0.84             |
| Naphthalene, decahydro-1, 5-dimethyl- | 0.98             | 7-Hexadecene                             | 0.76             |
| 2-Cyclopentene-1-one -3-methyl-       | 0.76             |                                          |                  |

**Table S3.** Constituents of biofuel derived from pyrolysis using ZSM-5 catalyst.

| Rice straw Non catalytic pyrolysis    |                  | Rice straw (ZSM-5) catalytic pyrolysis        |                  |
|---------------------------------------|------------------|-----------------------------------------------|------------------|
| Name of Compounds                     | Relative area, % | Name of Compounds                             | Relative area, % |
| Phenol                                | 12.25            | 5,9-Dodecadien-2-one, 6,10-dimethyl-, (E,E))- | 9.78             |
| P-cresol                              | 10.88            | p-Cresol                                      | 9.86             |
| 3-butene-2-one-3-methyl-              | 10.00            | Phenol                                        | 8.85             |
| Isobutane                             | 9.16             | 2-Propanone, 1-hydroxy-                       | 5.39             |
| Naphthalene, decahydro-2, 3-dimethyl  | 5.69             | 1-Decene                                      | 6.09             |
| 1, 3-cyclopentadiene, 1-methyl        | 5.58             | Benzofuran, 2,3-dihydro-                      | 6.06             |
| Furane, 2, 3, 5-tri-methyl-           | 4.83             | Phenol, 2-methyl-                             | 5.43             |
| 2,4 –hexadienal                       | 4.04             | p-Xylene                                      | 5.56             |
| Benzene, 1-ethyl-4-methyl             | 3.84             | 1-Tridecene                                   | 4.89             |
| Benzofuran, 2, 4-dihydro              | 3.79             | Toluene                                       | 4.83             |
| 4-pentene-2-ol                        | 3.76             | 1-Tetradecene                                 | 4.26             |
| 2-Methylcyclopentene-1, 3-dion        | 3.39             | Pentadecane                                   | 3.96             |
| 2-pentanal-2-ethyl                    | 3.27             | Nonacos-1-ene                                 | 3.82             |
| oxalic acid allyl octyl ester         | 3.13             | 2-Cyclopenten-1-one                           | 3.71             |
| Phenol-2-methoxy                      | 2.82             | 1,13-Tetradecadiene                           | 3.54             |
| Phenol, 3-ethyl-5-methyl-             | 2.79             | Phenol, 4-ethyl-                              | 2.81             |
| Styrene                               | 2.52             | Phenol, 2-ethyl-5-methyl-                     | 2.72             |
| Phenol, 2-ethyl-5-methyl-             | 2.42             | Decane                                        | 2.16             |
| 1H-indene-1-one, 2, 3-dihydro         | 1.68             | 1-Undecene                                    | 1.95             |
| phenol-3,5-dimethyl                   | 1.50             | 6-Tridecene                                   | 1.37             |
| Tetrahydrofuran                       | 1.08             | 1-Dodecene                                    | 1.11             |
| Naphthalene, decahydro-1, 5-dimethyl- | 0.98             | 1,2-Benzenediol, 3-methyl-                    | 1.53             |
| 2-Cyclopentene-1-one -3-methyl-       | 0.76             | 1-Nonene                                      | 0.32             |

**Table S4.** Constituents of biofuel derived from pyrolysis using dual catalytic bed (CEM/ZSM-5).

| Rice straw Non catalytic pyrolysis    |                  | Dual Catalytic pyrolysis of rice straw              |                  |
|---------------------------------------|------------------|-----------------------------------------------------|------------------|
| Name of Compounds                     | Relative area, % | Name of Compounds                                   | Relative area, % |
| Phenol                                | 12.25            | Phenol, -3-methyl-                                  | 14.28            |
| P-cresol                              | 10.88            | Benzofuran, 2-methyl-                               | 10.71            |
| 3-butene-2-one-3-methyl-              | 10.00            | p-Cresol                                            | 9.10             |
| Isobutane                             | 9.16             | Phenol, 2-methyl-                                   | 6.91             |
| Naphthalene, decahydro-2, 3-dimethyl  | 5.69             | Toluene                                             | 6.55             |
| 1, 3-cyclopentadiene, 1-methyl        | 5.58             | o-Xylene                                            | 6.96             |
| Furane, 2, 3, 5-tri-methyl-           | 4.83             | Phenol, 4-ethyl-                                    | 5.33             |
| 2,4 –hexadienal                       | 4.04             | 2-Cyclopenten-1-one, 2-methyl-                      | 4.51             |
| Benzene, 1-ethyl-4-methyl             | 3.84             | 2-Cyclopenten-1-one                                 | 4.21             |
| Benzofuran, 2, 4-dihydro              | 3.79             | 1-Tridecene                                         | 3.79             |
| 4-pentene-2-ol                        | 3.76             | Cyclopropanecarboxylic acid, 1-acetyl-, ethyl ester | 3.25             |
| 2-Methylcyclopentene-1, 3-dion        | 3.39             | Propenoic acid, 2-trifluoroacetyl-amino-            | 2.95             |
| 2-pentanal-2-ethyl                    | 3.27             | Heptadecane                                         | 2.31             |
| oxalic acid allyl octyl ester         | 3.13             | 2,3-Dibenzyl-5,6-dihydroxypyrimidin-4(3H)-one       | 2.26             |
| Phenol-2-methoxy                      | 2.82             | Eicosane                                            | 2.07             |
| Phenol, 3-ethyl-5-methyl-             | 2.79             | Decane                                              | 5.59             |
| Styrene                               | 2.52             | 5-tert-Butylpyrogallol                              | 1.87             |
| Phenol, 2-ethyl-5-methyl-             | 2.42             | Pentadecane                                         | 1.72             |
| 1H-indene-1-one, 2, 3-dihydro         | 1.68             | Cyclopentanone                                      | 1.40             |
| phenol-3,5-dimethyl                   | 1.50             | Dodecane                                            | 2.67             |
| Tetrahydrofuran                       | 1.08             | 1-Nonadecene                                        | 0.68             |
| Naphthalene, decahydro-1, 5-dimethyl- | 0.98             | Hexadecane                                          | 0.53             |
| 2-Cyclopentene-1-one -3-methyl-       | 0.76             | Phenol                                              | 0.35             |
